# Supplementary material for: Enhanced performance and stability of low-bandgap mixed lead–tin halide perovskite photovoltaic solar cells and photodetectors via defect passivation with UiO-66-NH2 metal–organic frameworks and interfacial engineering
Source: Royal Society of Chemistry journal article supplement (doi:10.1039/d2me00032f), 2022-01-01
Supplement: d2me00032f1.pdf [file d2me00032f1.pdf]

## Electronic Supplementary Information

# Enhanced performance and stability of low-bandgap mixed lead-tin halide perovskite photovoltaic solar cells and photodetectors *via* defect passivation with UiO-66-NH<sub>2</sub> metal-organic frameworks and interfacial engineering

Chih-Yu Chang,<sup>a</sup> Kuan-Hsi Wu,<sup>a</sup> Chun-Ya Chang,<sup>a</sup> Rui-Fang Guo,<sup>b</sup> Guan-Lin Li,<sup>b</sup> and Cheng-Yu Wang\*<sup>b</sup>

<sup>a</sup> Department of Materials Science and Engineering, National Taiwan University of Science and Technology, Taipei, 10607, Taiwan (R.O.C.).

<sup>b</sup> Department of Materials Science and Engineering, National Yang Ming Chiao Tung University, Hsinchu 30010, Taiwan (R.O.C.). (E-mail: [ChengYuWang@nycu.edu.tw](mailto:ChengYuWang@nycu.edu.tw))

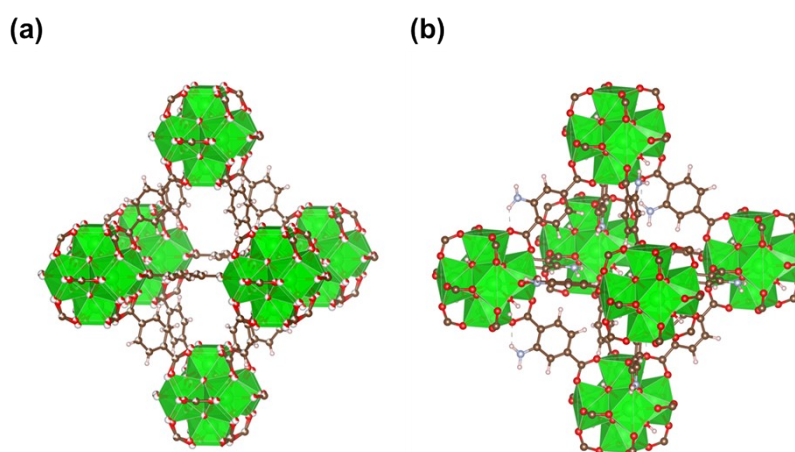

Fig. S1 (a) UiO-66 (ccdc: 733458); (b) UiO-66-NH<sub>2</sub> (ccdc: 1405751)

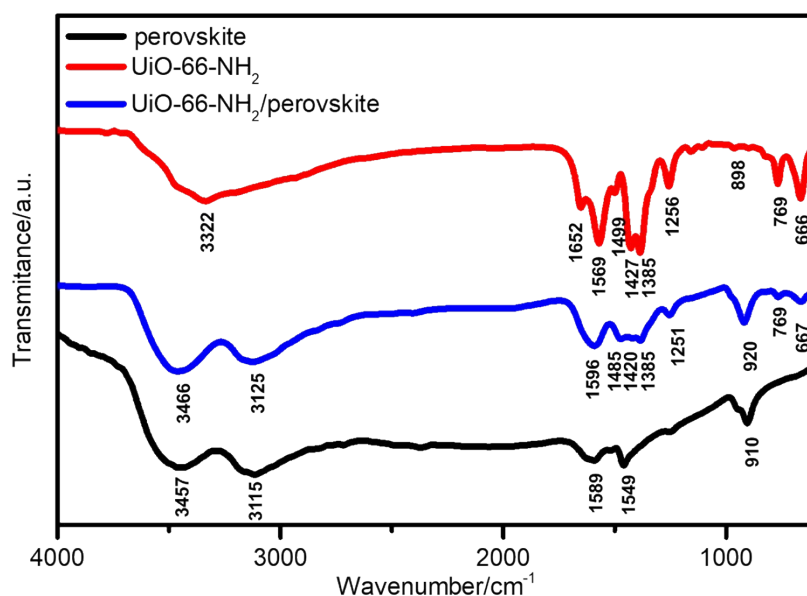

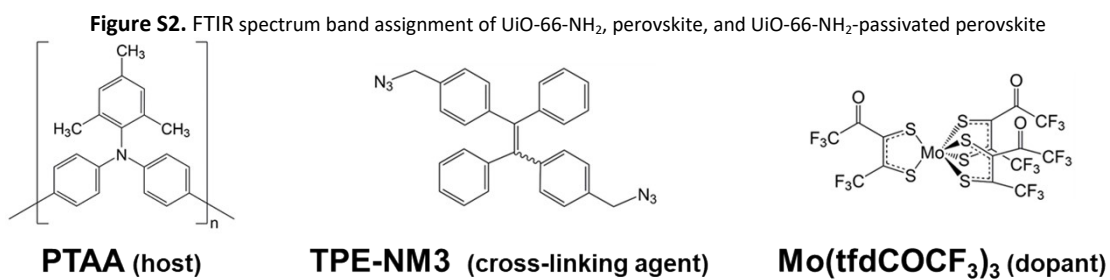

**Fig. S3** Schematic illustration of the molecular structures used in this study.

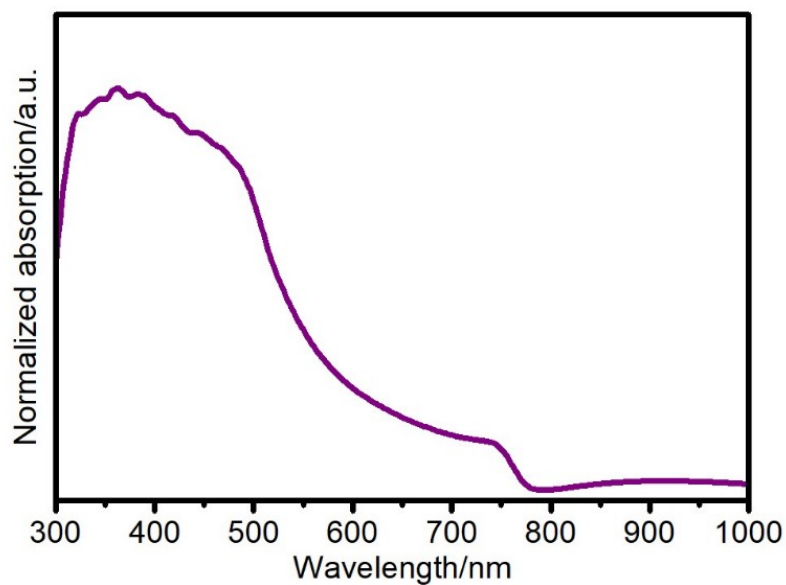

**Figure S4.** The absorption spectrum of the as-fabricated device

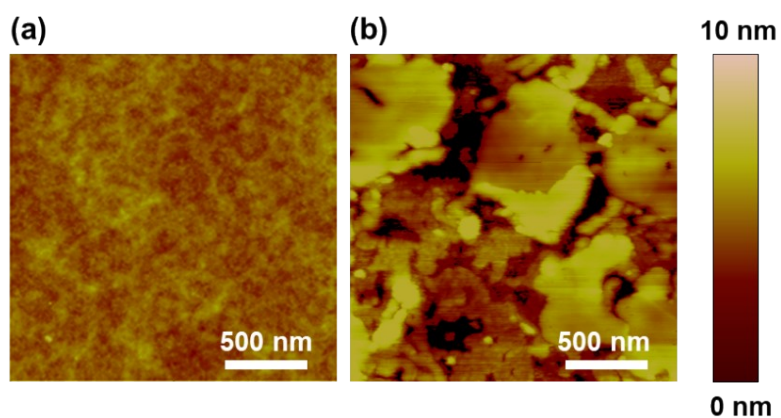

**Fig. S5** AFM topographic images of ITIC films at varied dopant concentrations: (a) 10 mol%. (b) 20 mol%.

**Table S1.** Summary of the photovoltaic performance of MOF-derived PSCs discussed in the text. <sup>1-7</sup>

| Reference | MOF and MOF-derived material | Function            | Perovskite                                                                                      | Application    | Device stability                          |
|-----------|------------------------------|---------------------|-------------------------------------------------------------------------------------------------|----------------|-------------------------------------------|
| 1         | ZIF-8/TiO <sub>2</sub>       | ETL                 | MAPbI <sub>3</sub>                                                                              | Solar cell     | Not reported                              |
| 2         | MZnO                         | ETL                 | FA <sub>0.83</sub> CS <sub>0.17</sub> PbI <sub>2.5</sub> Br <sub>0.5</sub>                      | Solar cell     | 77% of initial PCE remains after 30 day   |
| 3         | SP-MOF                       | HTL                 | MAPbI <sub>3</sub>                                                                              | Solar cell     | 54% of initial PCE remains after 9 day    |
| 4         | 2D graphite NPC              | HTL                 | CS <sub>0.05</sub> FA <sub>0.81</sub> MA <sub>0.14</sub> PbI <sub>2.55</sub> Br <sub>0.45</sub> | Solar cell     | 85.7% of initial PCE remains after 30 day |
| 5         | MOF-808                      | Interlayer/additive | MAPbI <sub>3</sub>                                                                              | Solar cell     | 80% of initial PCE remains after 30 day   |
| 5         | UiO-66                       | Interlayer/additive | MAPbI <sub>3</sub>                                                                              | Solar cell     | 70% of initial PCE remains after 30 day   |
| 6         | In <sub>2</sub>              | Additive            | MAPbI <sub>3</sub>                                                                              | Solar cell     | 90% of initial PCE remains after 25 day   |
| 7         | In-BTC                       | Additive            | CS <sub>0.05</sub> FA <sub>0.81</sub> MA <sub>0.14</sub> PbI <sub>2.55</sub> Br <sub>0.45</sub> | Solar cell     | 81.3% of initial PCE remains after 12 day |
| This work | UiO-66-NH <sub>2</sub>       | Additive            | CH <sub>3</sub> NH <sub>3</sub> Sn <sub>0.25</sub> Pb <sub>0.75</sub> I <sub>3</sub>            | Solar cell/PDs | 60% of initial PCE remains after 23 day   |

**Table S2.** List of FTIR band assignment of UiO-66-NH<sub>2</sub>, perovskite, and UiO-66-NH<sub>2</sub>/perovskite

| Vibration mode assignment | UiO-66-NH <sub>2</sub> [cm <sup>-1</sup> ] | Perovskite [cm <sup>-1</sup> ] | UiO-66-NH <sub>2</sub> /perovskite [cm <sup>-1</sup> ] |
|---------------------------|--------------------------------------------|--------------------------------|--------------------------------------------------------|
| N-H (stretch)             |                                            | 3457                           | 3466                                                   |
| O-H (stretch)             | 3322                                       |                                |                                                        |
| C-H (stretch)             | -                                          | 3115                           | 3125                                                   |
| N-H (bending)             | 1652                                       | 1589                           | 1596                                                   |
| O-C-O (asymmetric)        | 1569                                       | -                              | 1596                                                   |
| C-H (bending)             | 1499                                       | 1459                           | 1485                                                   |
| C=C (aromatic C=C)        | 1427                                       | -                              | 1420                                                   |
| O-C-O (symmetric)         | 1385                                       |                                | 1385                                                   |
| C-N (stretch)             | 1256                                       | -                              | 1251                                                   |
| N-H (wag)                 | 898                                        | 910                            | 920                                                    |
| Zr-O                      | 769                                        | -                              | 769                                                    |
| Zr-O                      | 666                                        | -                              | 667                                                    |

**Table S3.** Degradation table of the devices as a function of storage time in ambient conditions (25 °C and 70% relative humidity). Average and standard deviation values are obtained based on 5 devices. The values in parenthesis are for the best-performing devices.

| Device A | Storage times [hour] | PCE [%]            | Device D | Storage times [hour] | PCE [%]              |
|----------|----------------------|--------------------|----------|----------------------|----------------------|
|          | 0                    | 9.20 ± 0.67 (9.95) |          | 0                    | 13.06 ± 0.76 (13.93) |
|          | 14                   | 7.91 ± 0.58 (8.56) |          | 13                   | 11.62 ± 0.67 (12.39) |
|          | 65                   | 7.30 ± 0.53 (7.89) |          | 59                   | 10.88 ± 0.63 (11.56) |
|          | 123                  | 6.52 ± 0.47 (7.05) |          | 113                  | 10.56 ± 0.61 (10.83) |
|          | 184                  | 5.75 ± 0.42 (6.21) |          | 174                  | 9.71 ± 0.56 (10.37)  |
|          | 277                  | 3.89 ± 0.28 (4.20) |          | 267                  | 9.42 ± 0.55 (10.06)  |
|          | 391                  | 2.28 ± 0.16 (2.47) |          | 372                  | 8.85 ± 0.52 (9.43)   |
|          |                      |                    |          | 454                  | 8.27 ± 0.49 (8.81)   |
|          |                      |                    |          | 551                  | 7.87 ± 0.47 (8.40)   |

## Notes and references

- H.-Y. Chung, C.-H. Lin, S. Prabu and H.-W. Wang, *Journal of the Chinese Chemical Society*, 2018, **65**, 1476-1481.
- Y.-N. Zhang, B. Li, L. Fu, Q. Li and L.-W. Yin, *Electrochimica Acta*, 2020, **330**, 135280.
- L. Huang, X. Zhou, R. Wu, C. Shi, R. Xue, J. Zou, C. Xu, J. Zhao and W. Zeng, *Journal of Power Sources*, 2019, **433**, 226699.
- X. Zhou, L. Qiu, R. Fan, A. Wang, H. Ye, C. Tian, S. Hao and Y. Yang, *Solar RRL*, 2020, **4**, 1900380.
- C.-C. Lee, C.-I. Chen, Y.-T. Liao, K. C.-W. Wu and C.-C. Chueh, *Adv. Sci.*, 2019, **6**, 1801715.
- M. Li, D. Xia, A. Jiang, X. Du, X. Fan, L. Qiu, P. Wang, R. Fan and Y. Yang, *Energy Technol.*, 2019, **7**, 1900027.
- X. Zhou, L. Qiu, R. Fan, J. Zhang, S. Hao and Y. Yang, *Nano-Micro Letters*, 2020, **12**, 80.
